# Supplementary material for: Comparative genomics of the social amoebae Dictyostelium discoideum and Dictyostelium purpureum
Source: Springer Nature journal article supplement (doi:10.1186/gb-2011-12-2-r20), 2011-02-28

**(a)**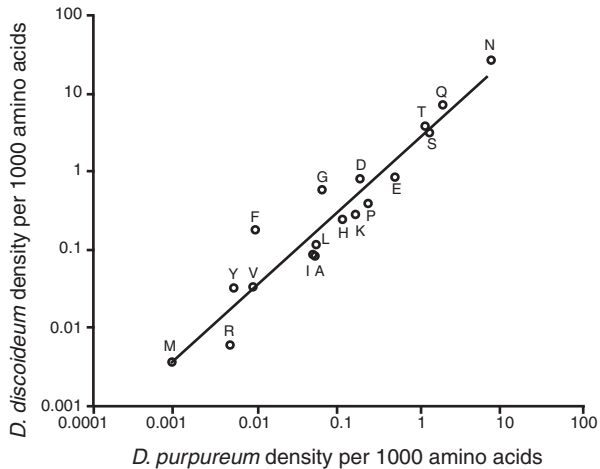**(b)**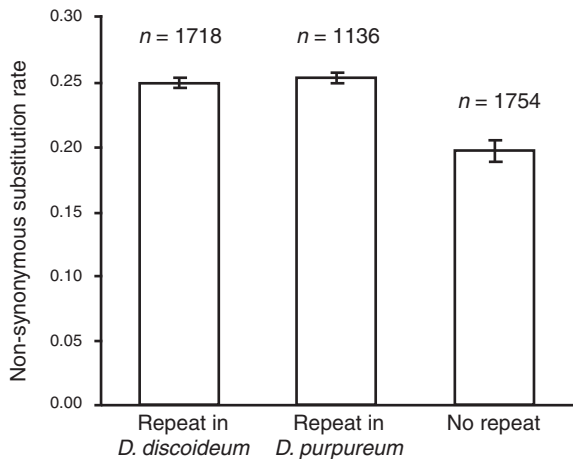

Supplement: 13059_2010_2497_MOESM6_ESM.pdf [file 13059_2010_2497_MOESM6_ESM.pdf]
