# Supplementary material for: Comparative genomics of the social amoebae Dictyostelium discoideum and Dictyostelium purpureum
Source: Springer Nature journal article supplement (doi:10.1186/gb-2011-12-2-r20), 2011-02-28
Supplement: 13059_2010_2497_MOESM8_ESM.pdf [file 13059_2010_2497_MOESM8_ESM.pdf]

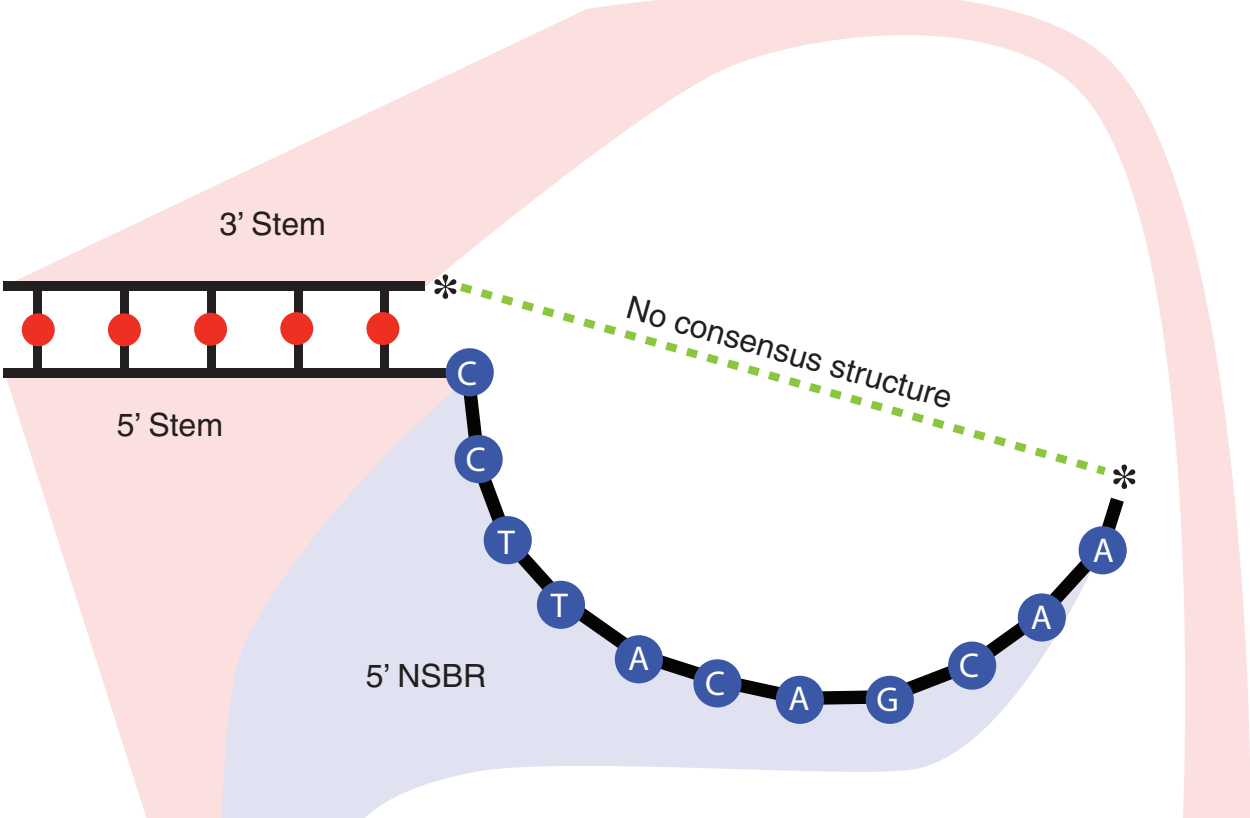

|         |                                                                                          |
|---------|------------------------------------------------------------------------------------------|
| Dd_r49  | GTTACCTTACAGCAA-TCTTACAGTTCCTTCATTCTAAGAAAACCTTCCTCAACTGCTTTTCTTAATTC-TTCTTATGGAT        |
| Dd_r21  | GTTGACCTTACAGCAAACCCCTAC-----AGT---CATTTCAT-----AAGAAAAAC---TACCTCAAC                    |
| Dd_r23A | GTTGACCTTACAGCAAATCTAAC-----ATTCCTTACATTC-----AAAGA-AAC---CTTCGTC AAC                    |
| Dd_r25  | GTTGACCTTACAGCAAATCTTAC-----AGTTCCTTCATTCT-----AAGAAAAACC---TCCGTC AAC                   |
| Dd_r28  | GTTGACCTTACAGCAAATCTAATC-----ACAAATTTTTACTTCAC-----AAAAAAAAAACCCCTTCGTC AAC              |
| Dd_r41  | GTTGACCTTACAGCAAATCTTAA-----AGTACTTCATTCT-----AAGAAAAAC---TCCTGTC AAC                    |
| Dd_r47  | GCTGACCTTACAGCAATCTTATC-----ACT--CTACATTC-----AAAGAAATC---CTTCGTCAGC                     |
| Dd_r59  | GTTGACCTTACAGCAATCTCAAC-----AATTTTATCACATT-----ATAAAAAA---AACCTCAGT                      |
| Dd_r62  | GTTGACCTTACAGCAAATCT-TG-----CAGAA--AACCTTA-----GTCAAC                                    |
| Dd_r35  | GCTCGCCTTACAGCAATCTACTCT-----G-ATTTTTCTCCAA-----AAAAAAAAC---CTTCGCGAGT                   |
| Dd_r36  | GCTCGCCTTACAGCAATCTACTCT-----GAATTTTTCTCCAA-----AAAAAAACC---CTTCGCGAGT                   |
| Dp_1    | GAATTCCTTACAGCAATGA--CT-----CATCTGAAACCCTT-----GGATTTC                                   |
| Dp_10   | GAATTCCTTACAGCAAT--ATAA-----C--ATTCAAATTTAAC-----TCTGAAAT---CTTGAATTC                    |
| Dp_11   | GAATTCCTTACAGCAATTAAGT-----C--ATTCAAATTTAAC-----TCTGAAAT---CTCGAATTC                     |
| Dp_19   | GAATTCCTTACAGCAATTAAGT-----GACTCTGAAATCTT-----AAATTC                                     |
| Dp_2    | GAATTCCTTACAGCAATTA-CAT-----TATTGAAGAAACCT-----GAATTC                                    |
| Dp_20   | GAATTCCTTACAGCAATTAAGT-----C--ATTCAAATTTAAC-----TCTGAAAT---CTCGAATTC                     |
| Dp_22   | GAATTCCTTACAGCAATTTATCT-----CTCTTTGAATTCGGTTA-----GTATCGAAAG-ATATTGGGGTTC                |
| Dp_4    | GAATTCCTTACAGCAATTTG--AC-----ATTTTCCTCCC-----ATAGAAAAA---ATCCGAATTC                      |
| Dp_13   | GAATTCCTTACAGCAATGAAATGATG-----ATCTGGAGAGACCCACTCATTAGAGAACCATGGGCTTTCCGGGAAAAATTCGATTTC |
| Dp_3    | GAATTCCTTACAGCAATCAAAAGTTT--ATCTTACAGCCCACT-----GGCTTTCTCGGAAAAATTCGATTTC                |
