# Supplementary material for: Comparative genomics of the social amoebae Dictyostelium discoideum and Dictyostelium purpureum
Source: Springer Nature journal article supplement (doi:10.1186/gb-2011-12-2-r20), 2011-02-28

**(a) Cyclases**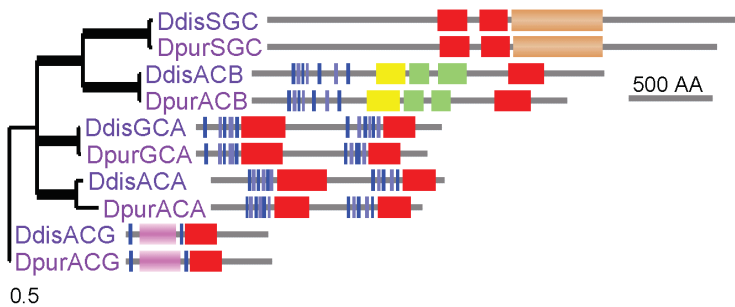**(c) cNMP binding domains**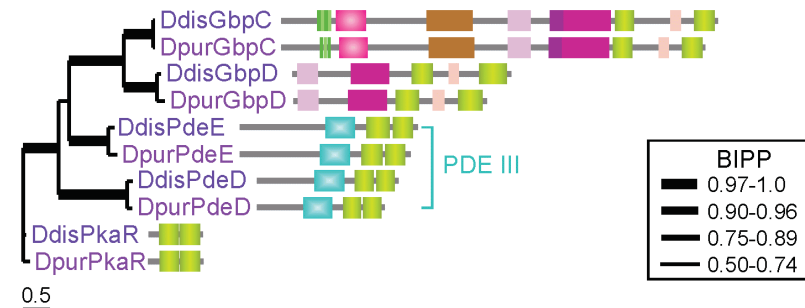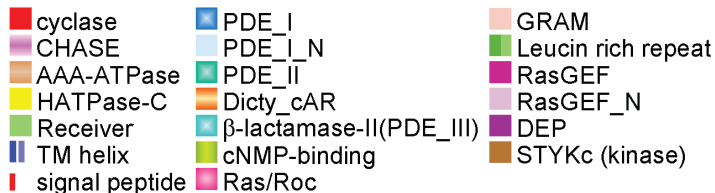**(b) cAMP receptors**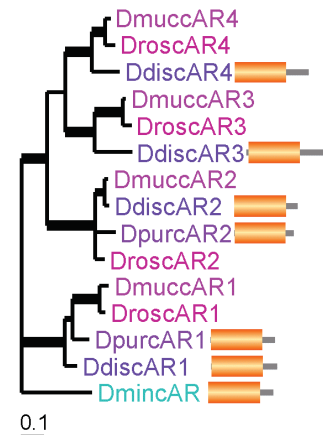**(d) cNMP phosphodiesterases**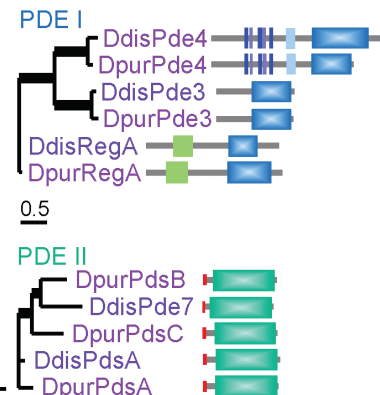

Supplement: 13059_2010_2497_MOESM11_ESM.pdf [file 13059_2010_2497_MOESM11_ESM.pdf]
